# Supplementary material for: The DNA-binding protein HTa from Thermoplasma acidophilum is an archaeal histone analog
Source: eLife journal article supplement (doi:10.7554/elife.52542), 2019-11-11
Supplement: supp [file elife-52542-supp-v1.zip]

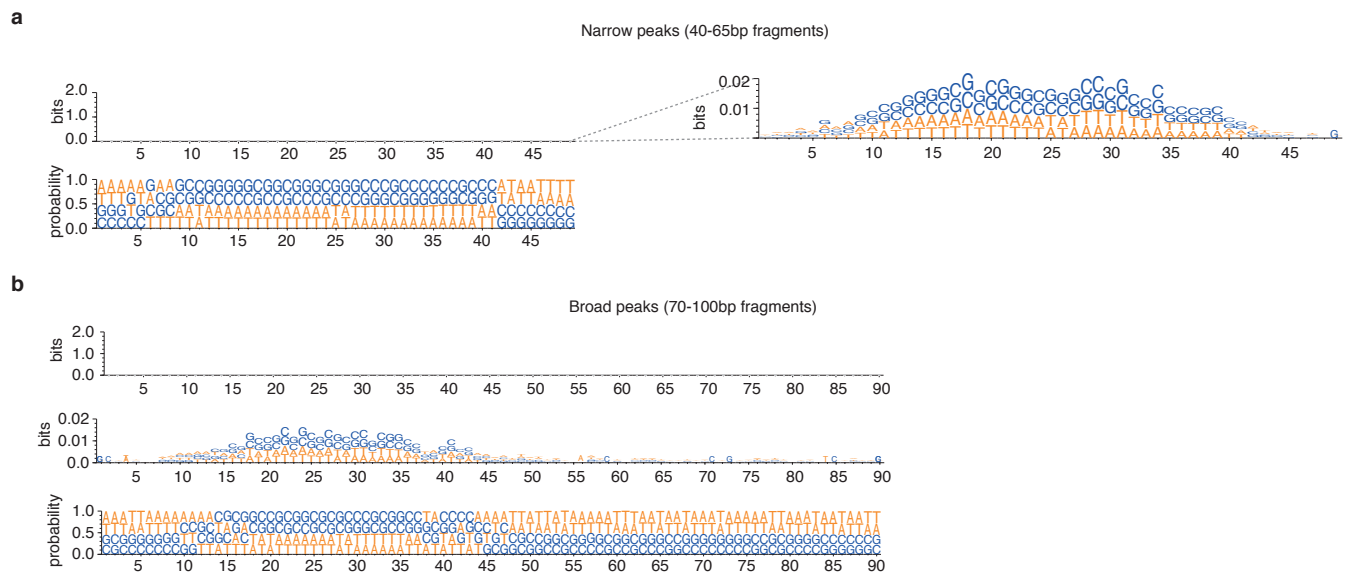

**Figure 4 - figure supplement 1.** Weblogs of bitscores and nucleotide occurrence probabilities at **(a)** narrow and **(b)** broad peaks detected during exponential phase in *T. acidophilum*. Information content is so low that the bitscore plots appear empty when using the common 0-2 bit visualization range. Logos are only visible when zooming in on the 0-0.02 range.
