# Supplementary material for: The DNA-binding protein HTa from Thermoplasma acidophilum is an archaeal histone analog
Source: eLife journal article supplement (doi:10.7554/elife.52542), 2019-11-11
Supplement: supp [file elife-52542-supp-v1.zip]

**a**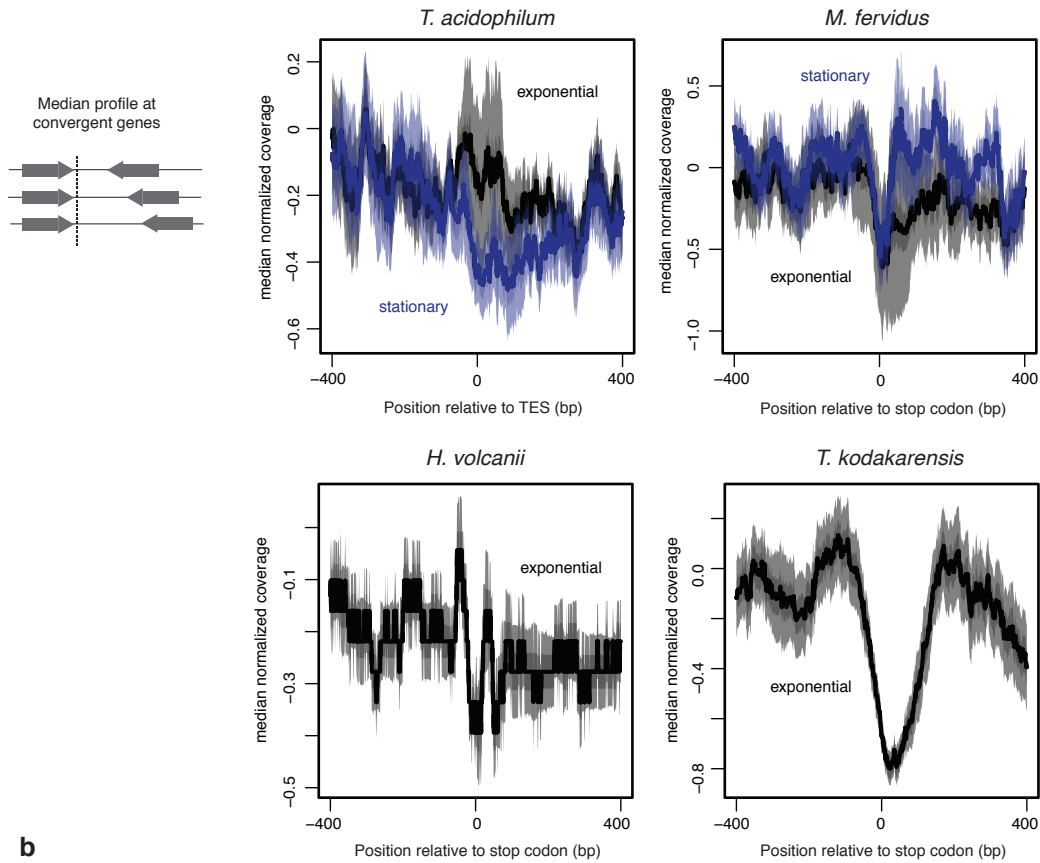**b**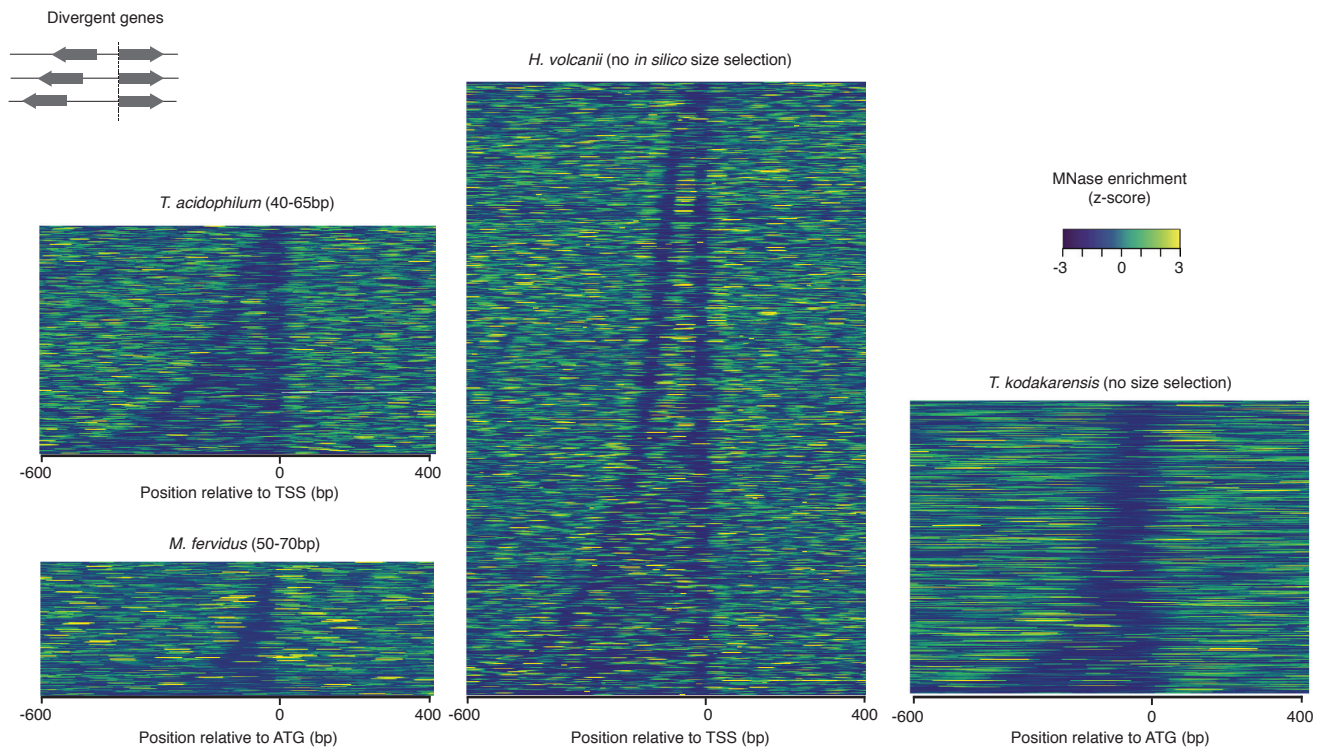

**Figure 8 - figure supplement 1.** (a) Median normalized MNase-seq coverage across fragment sizes relative to the distance from TESs or stop codons in different species. To ensure that the stop codons constitute a reasonable proxy for the TES, only genes with a convergently oriented downstream neighbouring gene are considered, thus eliminating genes internal to operons. (b) Heat maps displaying normalized MNase-seq coverage at divergent genes relative to the distance from the start codon (ATG) or TSS in different species. Intergenic regions are sorted according to their width.
