# Supplementary material for: The DNA-binding protein HTa from Thermoplasma acidophilum is an archaeal histone analog
Source: eLife journal article supplement (doi:10.7554/elife.52542), 2019-11-11
Supplement: supp [file elife-52542-supp-v1.zip]

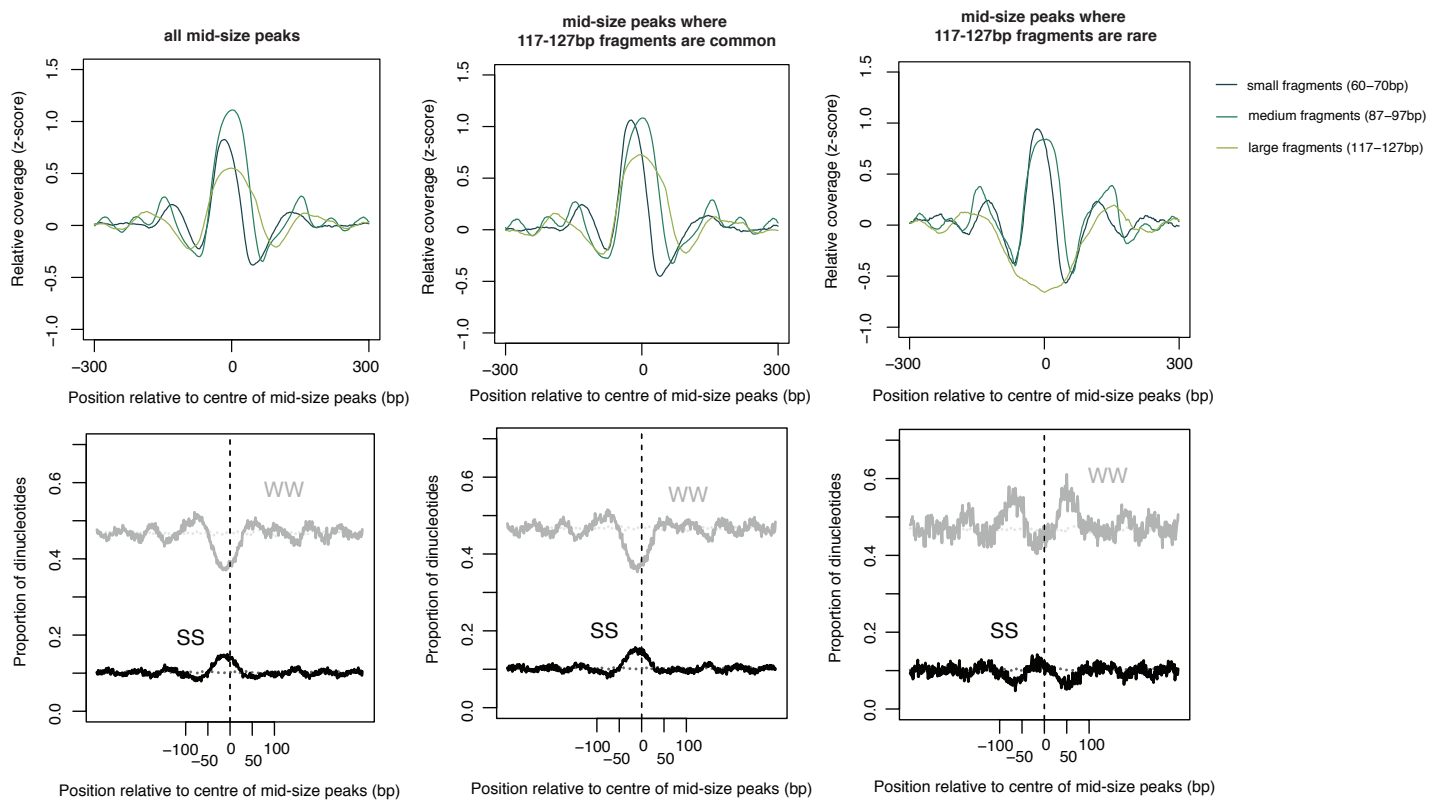

**Figure 4 - figure supplement 3.** As in Figure 4 - figure supplement 2 but for 87-97bp peaks scored according to 117-127bp fragments and oriented according to 60-70bp fragments. Note the increase in WW content flanking the smaller-sized peaks that do not get extended further.
