# Supplementary material for: The DNA-binding protein HTa from Thermoplasma acidophilum is an archaeal histone analog
Source: eLife journal article supplement (doi:10.7554/elife.52542), 2019-11-11
Supplement: supp [file elife-52542-supp-v1.zip]

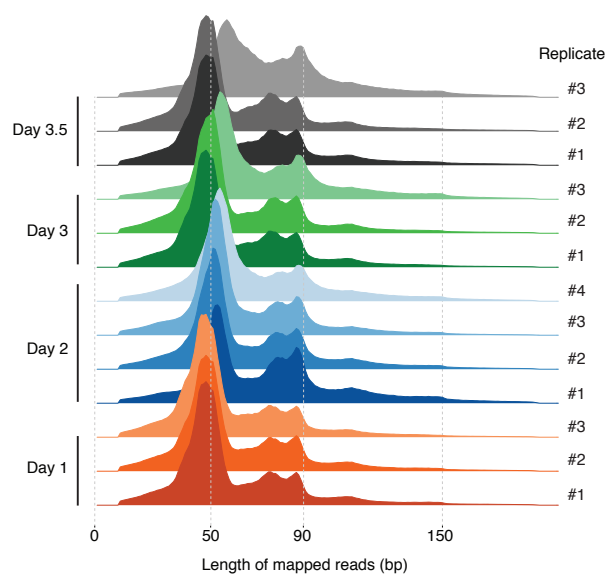

**Figure 3 - figure supplement 2.** Distribution of the lengths of fragments mapped to the *T. acidophilum* genome for all replicates across the growth cycle.
