# Supplementary material for: The DNA-binding protein HTa from Thermoplasma acidophilum is an archaeal histone analog
Source: eLife journal article supplement (doi:10.7554/elife.52542), 2019-11-11
Supplement: supp [file elife-52542-supp-v1.zip]

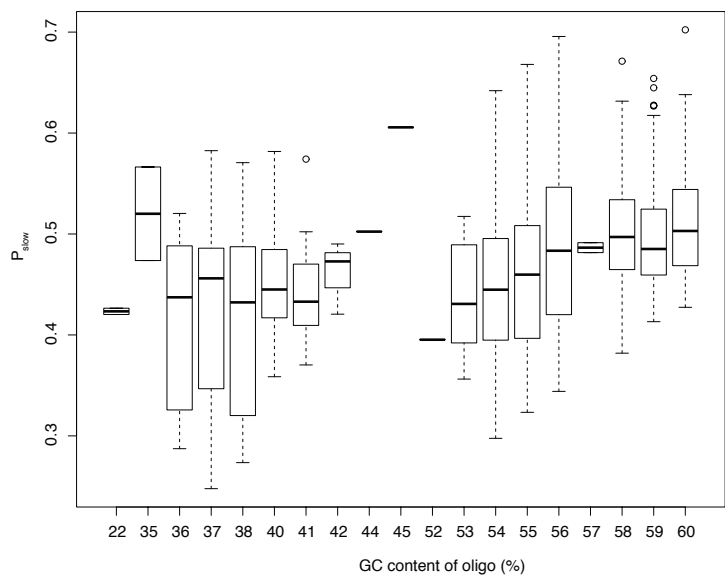

**Figure 6 - figure supplement 3. The relationship between GC content of an oligo and  $P_{slow}$ .** Only oligos represented by at least 200 sequenced reads are considered. This analysis shows that results in Figure 6e are not driven by few highly abundant oligos but represent the cumulative effect of different oligos acting in the same direction.
