# Supplementary material for: The DNA-binding protein HTa from Thermoplasma acidophilum is an archaeal histone analog
Source: eLife journal article supplement (doi:10.7554/elife.52542), 2019-11-11
Supplement: supp [file elife-52542-supp-v1.zip]

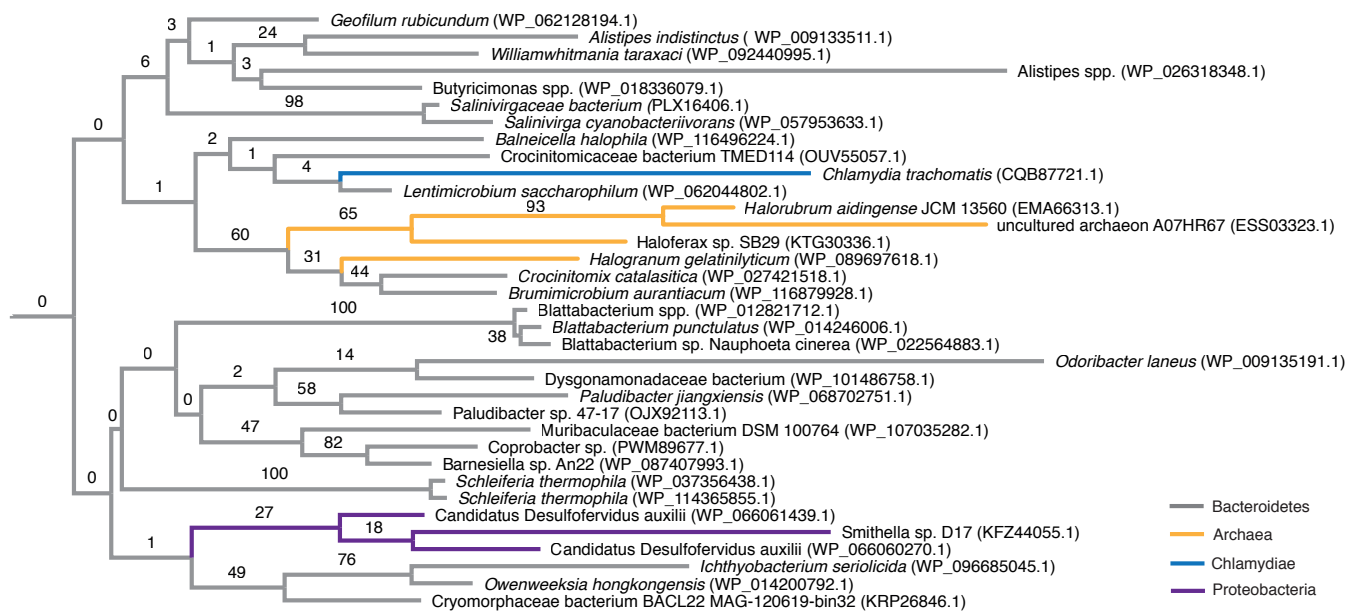

**Figure 2 - figure supplement 1. Phylogenetic placement of HU proteins attributed to halophilic archaea.**

The phylogenetic tree shown is an excerpt of the protein-level HU family tree shown in Figure 2, focussing on sequences from halophilic archaea (orange), which cluster mainly with sequences of bacteria from the phylum Bacteroidetes (grey). As is true for the majority of the HU protein tree, deeper ancestral relationships are poorly resolved.
