# Supplementary material for: The DNA-binding protein HTa from Thermoplasma acidophilum is an archaeal histone analog
Source: eLife journal article supplement (doi:10.7554/elife.52542), 2019-11-11
Supplement: supp [file elife-52542-supp-v1.zip]

**a**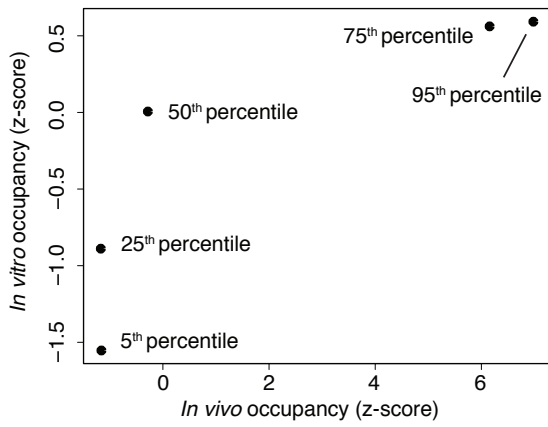**c**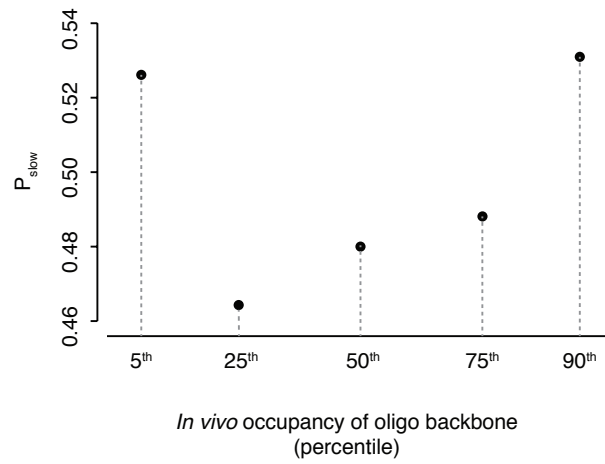**b**

5th percentile: CAAAATACGATAATAATTTAGAGGAATTATCAGCACATACTCCTTATATTCTTATATTAGTCTAAATATTATGAAACCATCCTTAGTTATTGCGGT  
Coordinates: 444079-444178  
25th percentile: AATATTTATATTAAAGATTGCATTATTAACCTGGTATAGCTATGGAGTCCGGATTTAAGATATCAGTTTTTCATTATCGTATTGATTGTGAGTATAGCAC  
Coordinates: 408471-408570  
50th percentile: TGAGGACAGAAATCAAAATCCCTGGAAACAACTGCTGGCGAATAGAGGTGTATAAATGCTCGACTTCAAAGGCCAAACGCTGTGATAACCGGTGGATCT  
Coordinates: 790932-791031  
75th percentile: ATTGCTTATGTCCACGTGGAATCCTATACCAGAACCGAAGGACATCTCTGAAAGTGCAGCGAACAGCCCGCGGATGACACATCGTGCTTGATAGGATC  
Coordinates: 1138028-1138127  
95th percentile: CACGTGGAATCCTATACCAGAACCGAAGGACATCTCTGAAAGTGCAGCGAACAGCCCGCGGATGACACATCGTGCTTGATAGGATCATGTCAGCCTTC  
Coordinates: 1138040-1138139

**Figure 6 - figure supplement 2.** (a) *In vivo* occupancy (day 2) at five 100bp regions detailed in (b) is correlated with *in vitro* occupancy. Randomized dinucleotides are highlighted in green. (c) The proportion  $P_{\text{slow}}$  of diversified oligos associated with a given oligo backbone in (b) recovered from the HTa-bound slow band (see Figure 6e). Values in (a) and (c) are based on pooled read data from two independent EMSA experiments. Trends visualized here are also observed for both replicates individually.
