# Supplementary material for: The DNA-binding protein HTa from Thermoplasma acidophilum is an archaeal histone analog
Source: eLife journal article supplement (doi:10.7554/elife.52542), 2019-11-11
Supplement: supp [file elife-52542-supp-v1.zip]

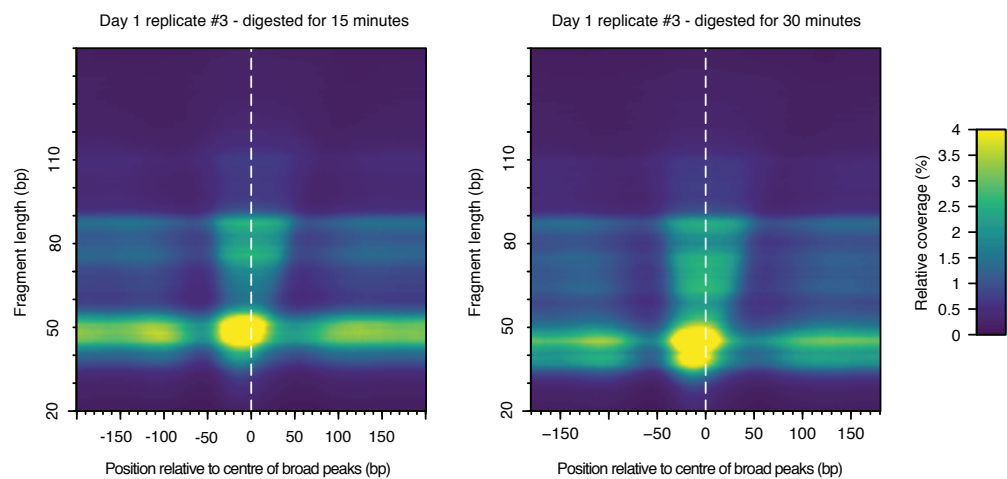

**Figure 3 - figure supplement 3.** Heat maps indicating MNase-seq coverage by fragment length relative to the centre of broad peaks in *T. acidophilum*, for the same sample (day1, replicate 3), digested for either 15 or 30 minutes.
