# Supplementary material for: The DNA-binding protein HTa from Thermoplasma acidophilum is an archaeal histone analog
Source: eLife journal article supplement (doi:10.7554/elife.52542), 2019-11-11
Supplement: supp [file elife-52542-supp-v1.zip]

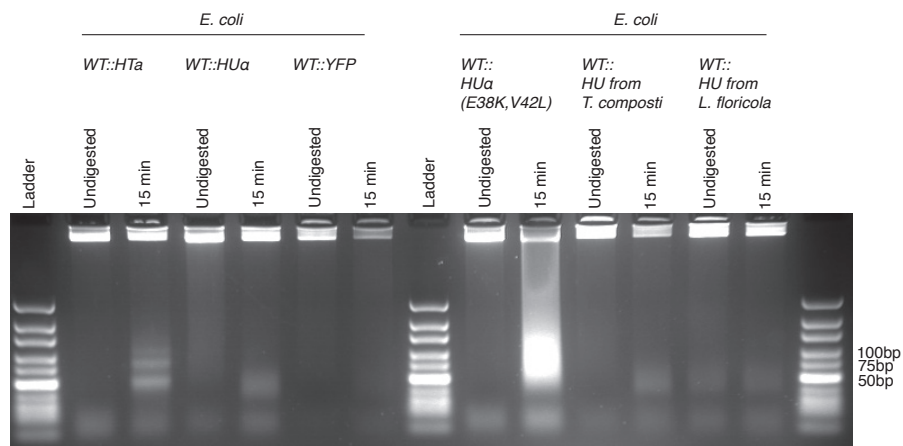

**Figure 3 - figure supplement 1.** Agarose gel (3%) of MNase digestion products from *T. acidophilum* (day 2) along with digestion products of *E. coli* ectopically expressing either HTa, HupA, YFP, HupA (E38K,V42L), HU from *T. composti* or HU from *L. floricola*, from the same plasmid backbone. HupA (E38K,V42L) is a mutant that had previously been shown to induce extreme compaction of the *E. coli* nucleoid (Kar et al. 2005).
