# Supplementary material for: The DNA-binding protein HTa from Thermoplasma acidophilum is an archaeal histone analog
Source: eLife journal article supplement (doi:10.7554/elife.52542), 2019-11-11
Supplement: supp [file elife-52542-supp-v1.zip]

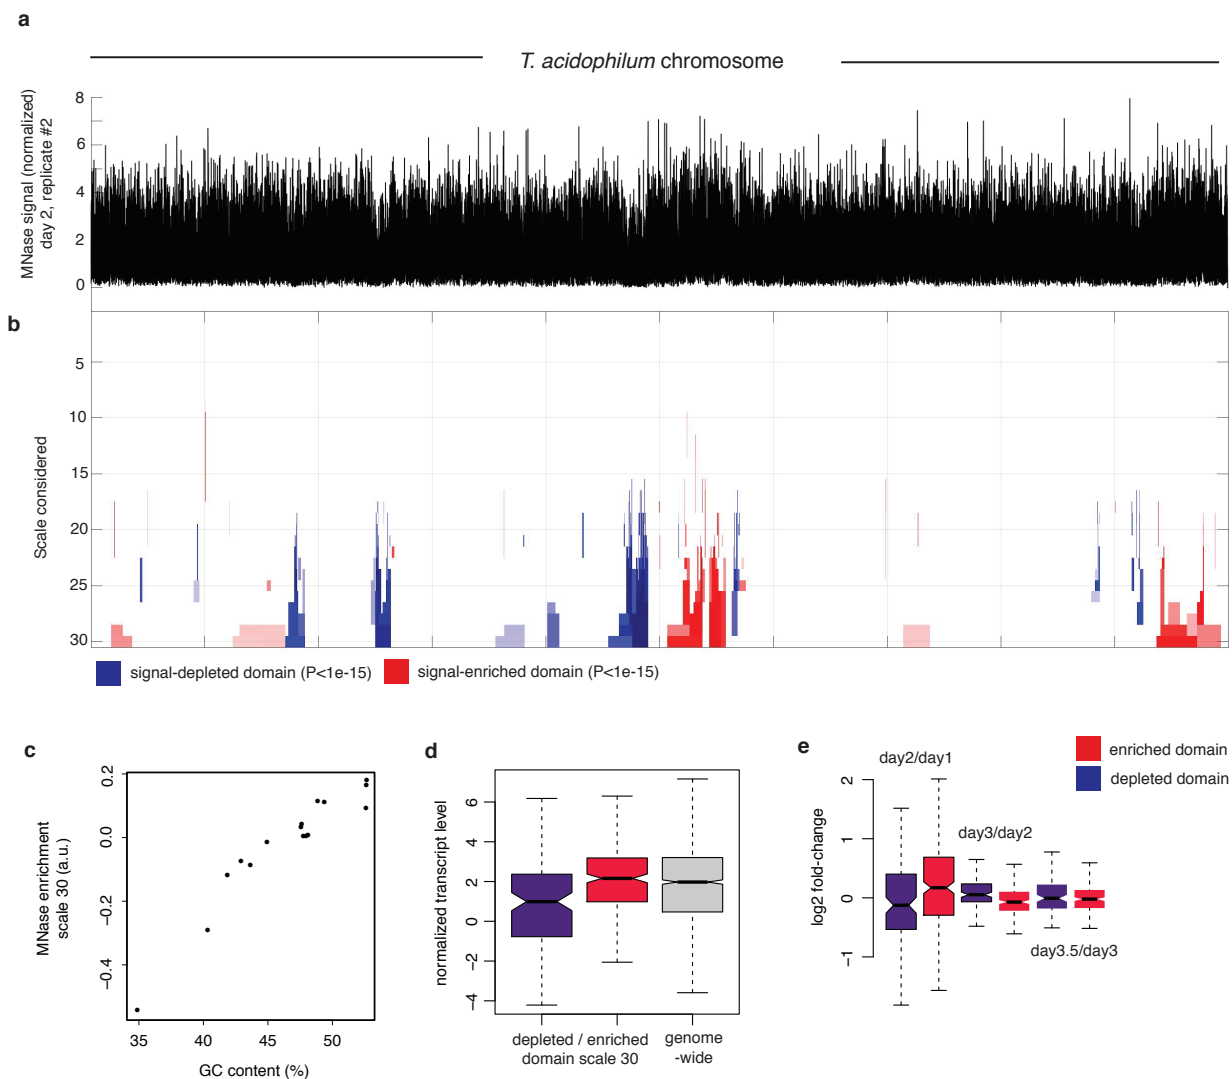

**Figure 3 - figure supplement 4.** (a) Chromosome-wide MNase-Seq coverage along the *T. acidophilum* chromosome (day2, replicate 2), normalized using sonicated DNA to remove replication-associated coverage bias. (b) Multiscale analysis of MNase signal enrichment (see Methods). Significantly enriched or depleted ( $p$ -value  $< 1.e-15$ ) segments are colour-coded red and blue, respectively. Scales correspond to increasing window sizes over which enrichment is computed. (c) Enrichment signal of significantly MNase-signal-enriched or -depleted genomic domains at scale 30 as a function GC content. (d) Normalized transcript levels for pooled depleted or enriched domains at scale 30 and (e) corresponding log<sub>2</sub>-fold changes in transcript levels.
