# Supplementary material for: The DNA-binding protein HTa from Thermoplasma acidophilum is an archaeal histone analog
Source: eLife journal article supplement (doi:10.7554/elife.52542), 2019-11-11
Supplement: supp [file elife-52542-supp-v1.zip]

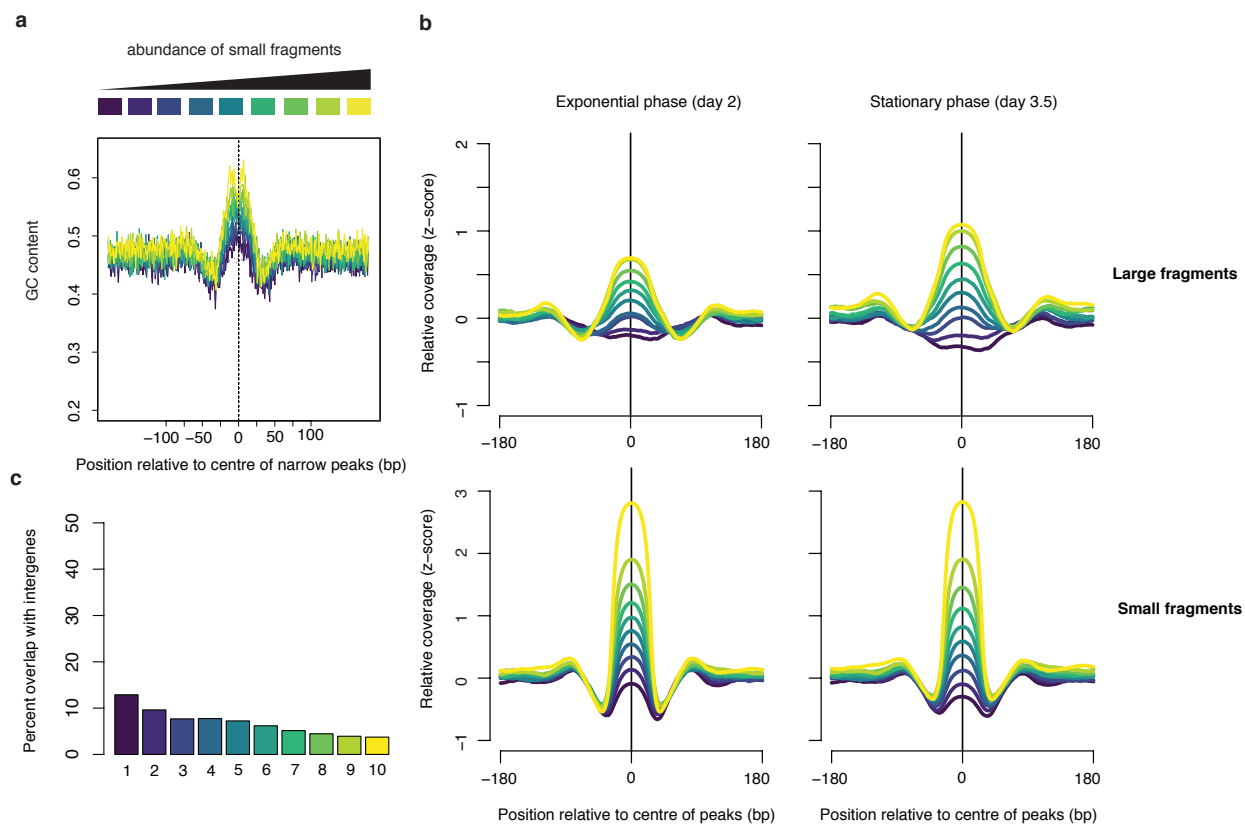

**Figure 7 - figure supplement 1.** (a) Average GC content at narrow peaks (day 2), separated into deciles based on the relative abundance of small fragments. (b) corresponding relative coverage for large and small fragments during exponential and stationary phase. (c) Percentage of overlap between narrow peaks and intergenic regions. For all graphs, decile decomposition is based on small fragment occupancy during exponential phase (day 2).
