# Supplementary material for: The DNA-binding protein HTa from Thermoplasma acidophilum is an archaeal histone analog
Source: eLife journal article supplement (doi:10.7554/elife.52542), 2019-11-11
Supplement: supp [file elife-52542-supp-v1.zip]

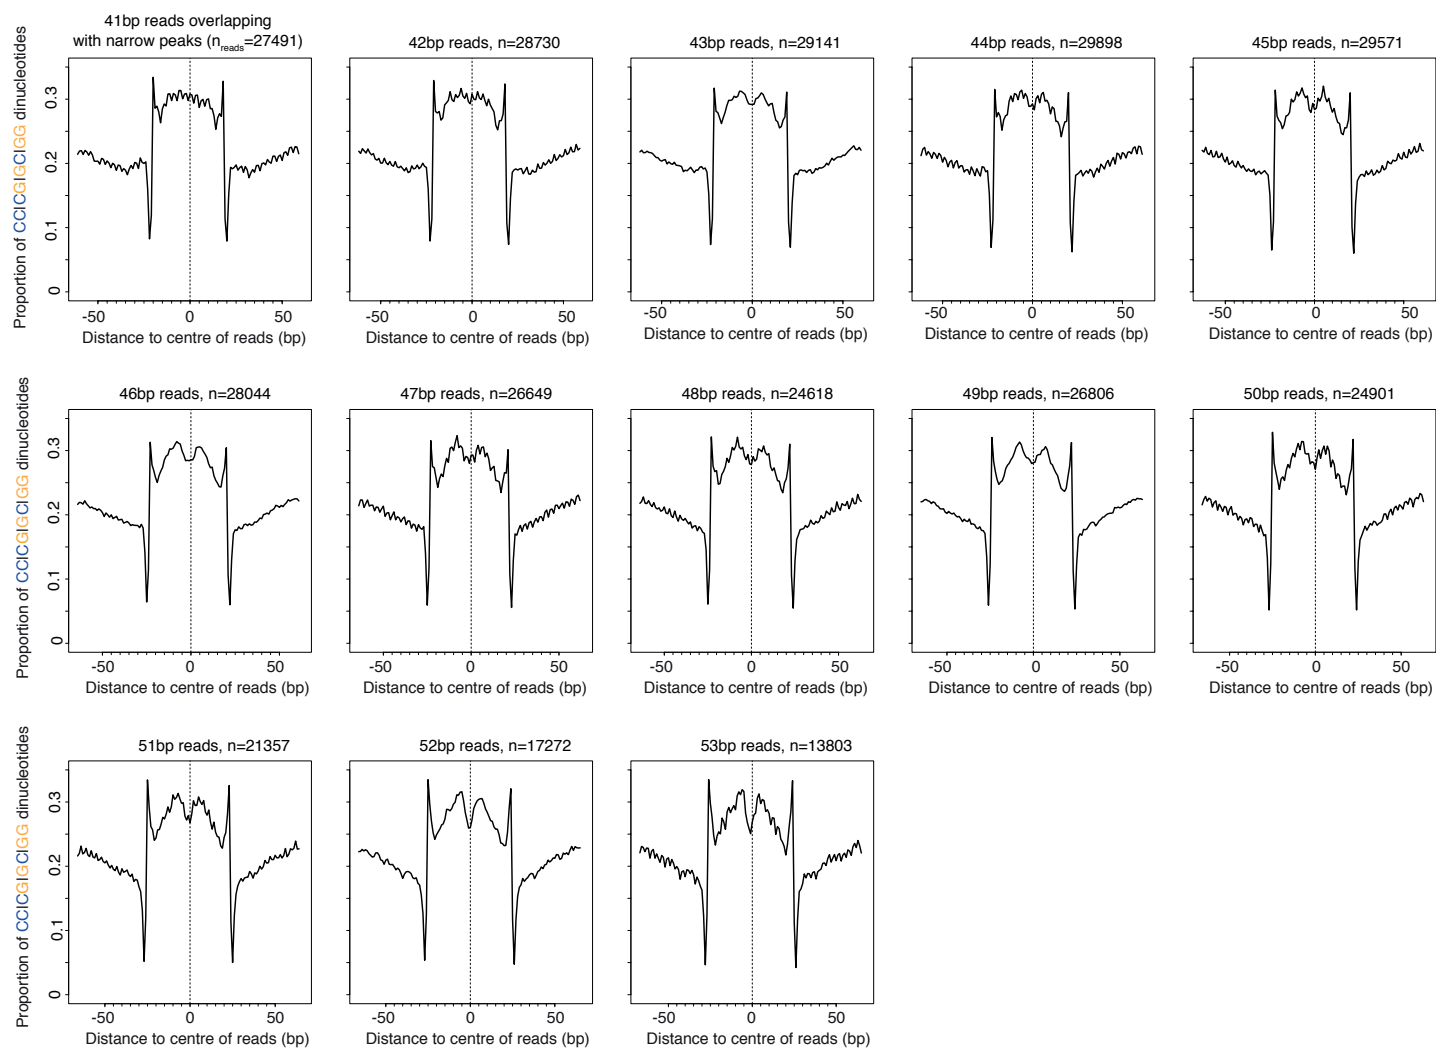

**Figure 5 - figure supplement 1.** Proportion of SS (= CCICGICIGG) dinucleotides relative to the centres of reads of defined length (41-53bp) in *T. acidophilum*.
